# Supplementary material for: Discovery of novel cinnamylidene-thiazolidinedione derivatives as PTP-1B inhibitors for the management of type 2 diabetes
Source: Royal Society of Chemistry journal article supplement (doi:10.1039/c6ra24501c), 2016-01-01
Supplement: c6ra24501c1.pdf [file c6ra24501c1.pdf]

## Discovery of Novel Cinnamylidene-Thiazolidinedione Derivatives as PTP-1B Inhibitors for the Management of Type 2 Diabetes

Suresh Thareja<sup>a,b,\*</sup>, Sant K. Verma<sup>a</sup>, Diksha Haksar<sup>b</sup>, Tilak R. Bhardwaj<sup>b</sup> and Manoj Kumar<sup>b</sup>

<sup>a</sup>School of Pharmaceutical Sciences, Guru Ghasidas Central University, Bilaspur- 495 009, C.G. (India);

<sup>b</sup>University Institute of Pharmaceutical Sciences, Panjab University, Chandigarh- 160 014 (India).

\*E-mail: [sureshthareja@gmail.com](mailto:sureshthareja@gmail.com)

### Supplementary Data

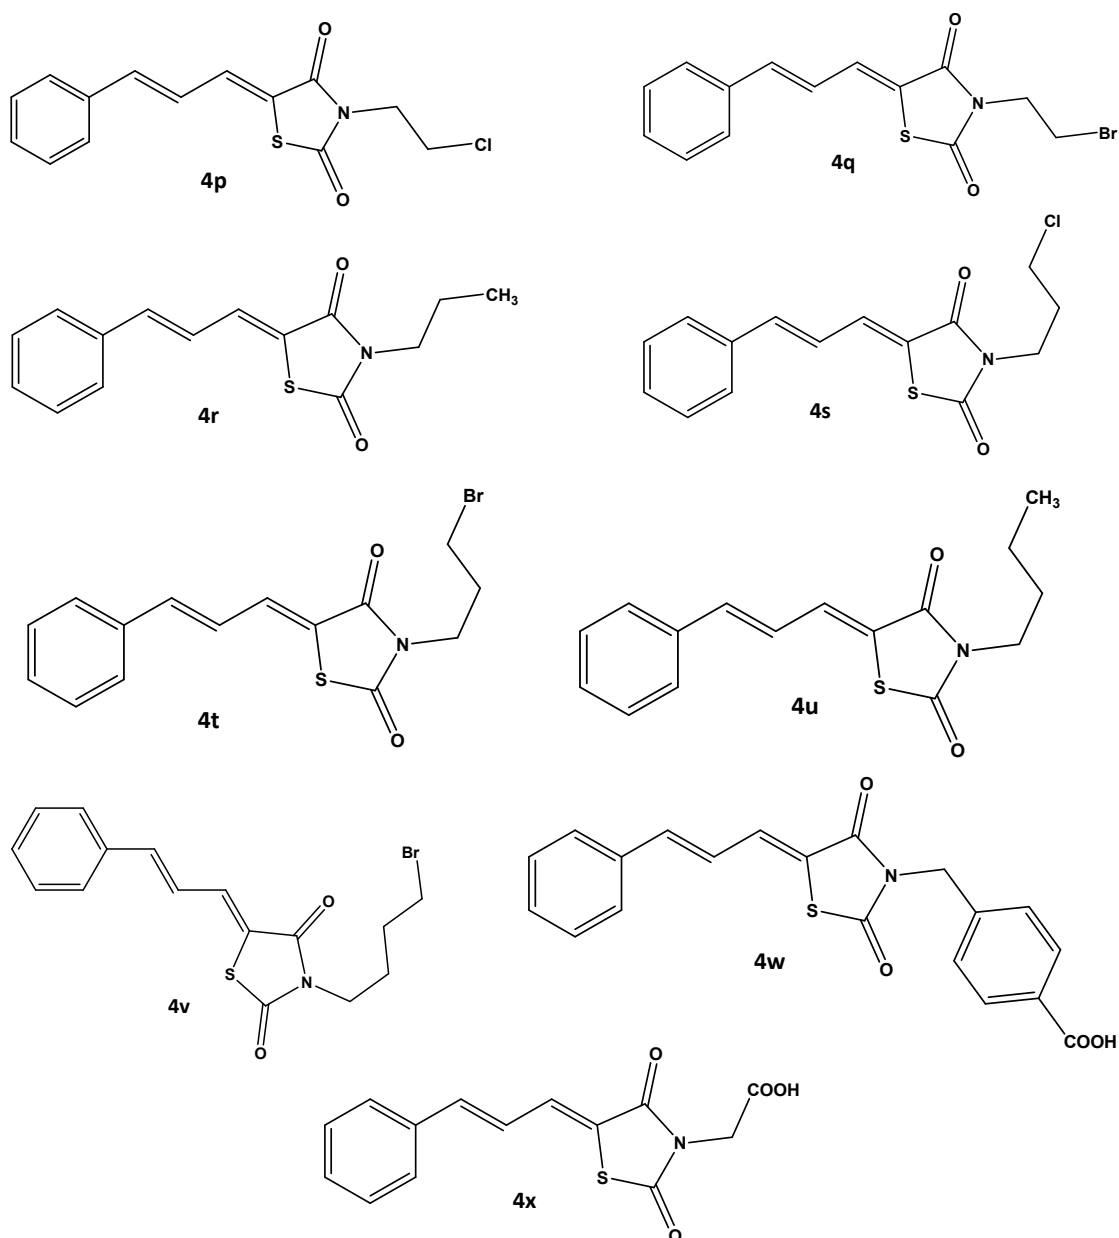

Figure S1 Structure of synthesized cinnamylidene-thiazolidinedione derivatives (4p-x)

**Table S1** Numeric data of change in body weight after treatment with cinnamylidene-thiazolidinedione derivatives (4p-x) in diabetic mice

| S. No.              | Body Weight (g) |                     |
|---------------------|-----------------|---------------------|
|                     | 0 Day           | 7 <sup>th</sup> Day |
| <b>Control</b>      | 29.33±0.47      | 26.33±0.24          |
| <b>Pioglitazone</b> | 24.33±2.09      | 26.67±1.93          |
| <b>4p</b>           | 27.33±0.24      | 29.33±0.62          |
| <b>4q</b>           | 25.67±1.31      | 26.33±1.18          |
| <b>4r</b>           | 27.67±0.85      | 27.67±0.85          |
| <b>4s</b>           | 27.00±4.24      | 27.67±3.06          |
| <b>4t</b>           | 25.00±2.55      | 26.33±2.39          |
| <b>4u</b>           | 29.00±3.19      | 30.33±3.01          |
| <b>4v</b>           | 28.67±1.65      | 30.33±1.65          |
| <b>4w</b>           | 22.33±1.43      | 22.67±1.03          |
| <b>4x</b>           | 25.00±1.08      | 26.33±1.31          |

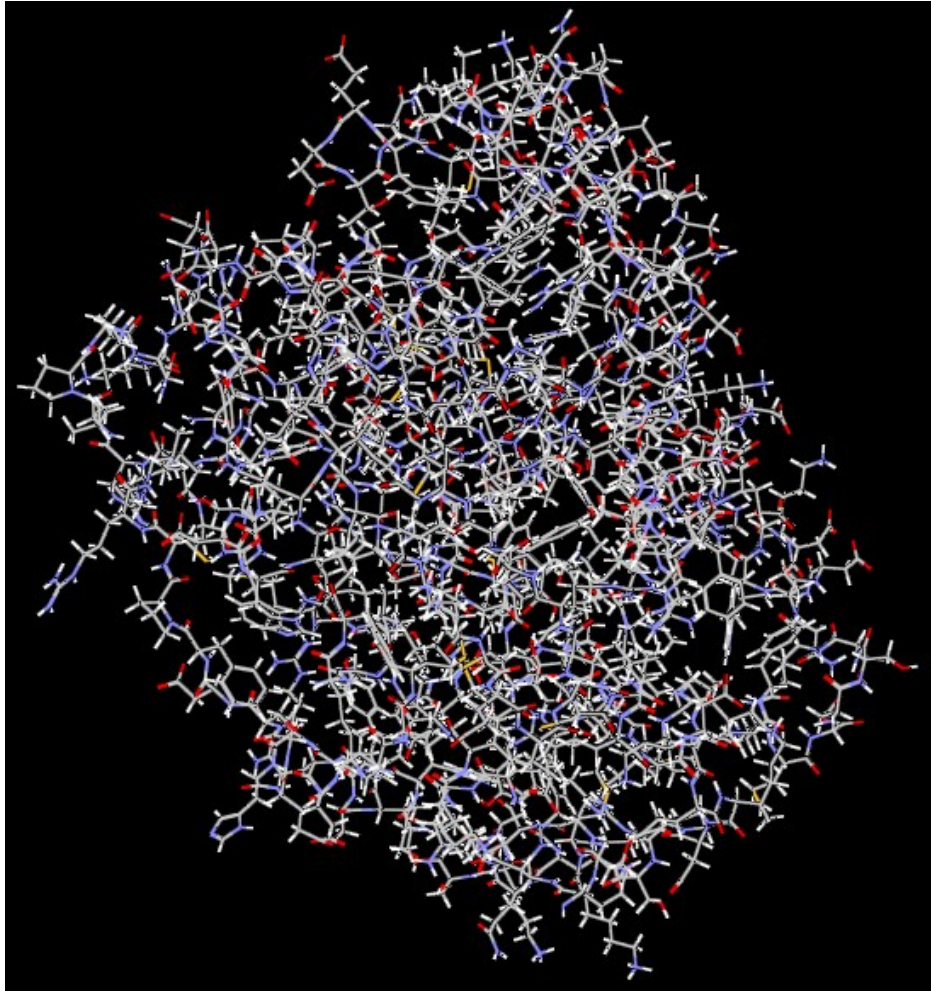

**Figure S2** Secondary of PTP-1B (PDB entry: 2QBS) (color of elements present in amino acid residues coded in standard CPK color coding)
